# Supplementary material for: WiseEye: Next Generation Expandable and Programmable Camera Trap Platform for Wildlife Research
Source: PubMed Central journal article supplement (PMC5226779; doi:10.1371/journal.pone.0169758), 2017-01-11
Supplement: pone.0169758.s002.pdf [file pone.0169758.s002.pdf]

## S2 Appendix. Solar panel power calculations.

1. Solar panel kit, 28 Watts (model number: L16BR, [www.maplin.co.uk](http://www.maplin.co.uk)).
2. Specifications:

|                                 |                  |
|---------------------------------|------------------|
| Power:                          | 28 Watts         |
| Peak Output:                    | 1.70A @ 17.6V    |
| Approximate watt-hours per day: | 196              |
| Approximate amp-hours per day:  | 11.9             |
| Dimensions:                     | 559 x 407 x 25mm |
| Weight:                         | 2.8kg            |

3. Battery Input =  $12\text{ V} \times 1.7\text{ A} = 20.4\text{ Watts}$   
for a 12 V battery voltage and 1.7 A peak charge (from the solar panel).
4. The conservative estimated output from solar panel was 6 Watts (instead of 20.4 Watts) based on 10 hours of daylight, sufficient to keep the battery charged to sustain a 2.5 Watts continuous load.
