# Supplementary material for: WiseEye: Next Generation Expandable and Programmable Camera Trap Platform for Wildlife Research
Source: PubMed Central journal article supplement (PMC5226779; doi:10.1371/journal.pone.0169758), 2017-01-11
Supplement: pone.0169758.s003.pdf [file pone.0169758.s003.pdf]

**S1 Table. Cost breakdown by component.**

| Item Description                     | Cost (£)      |                |
|--------------------------------------|---------------|----------------|
|                                      | Full System   | Minimum System |
| Raspberry Pi 2, model B              | 28.07         | 28.07          |
| Raspberry Pi (NOIR v1) camera        | 20.15         | 20.15          |
| Infrared LED panel                   | 15.99         | 15.99          |
| Real-time clock                      | 10.19         | 10.19          |
| PIR sensor                           | 6.30          | 6.30           |
| X-band microwave sensor              | 40.00         | -              |
| 12 to 5V converter                   | 15.44         | 15.44          |
| IP66 enclosure                       | 25.00         | 25.00          |
| Weatherproof ethernet connector      | 22.00         | -              |
| Misc. small components               | 20.00         | 20.00          |
| <b>Sub Total (excluding power)</b>   | <b>203.14</b> | <b>141.14</b>  |
| Solar panel                          | 119.99        | -              |
| 12 V deep-cycle rechargeable battery | 160.48        | 50.00          |
| Battery box                          | 64.99         | 25.00          |
| <b>Total (including power)</b>       | <b>548.6</b>  | <b>216.14</b>  |
