# Supplementary material for: WiseEye: Next Generation Expandable and Programmable Camera Trap Platform for Wildlife Research
Source: PubMed Central journal article supplement (PMC5226779; doi:10.1371/journal.pone.0169758), 2017-01-11
Supplement: pone.0169758.s004.pdf [file pone.0169758.s004.pdf]

**S2 Table. Format of Summary Data recorded to CSV file for a motion-activated image.**

Line 1 shows the case where PIR detection is not confirmed by radar. Line 2 shows detection confirmation by both PIR and radar. Threshold refers to the value used for background subtraction. 'PIR Count' and 'Radar Count' record the number of times PIR and Radar were triggered for one motion event.

| Image Filename  | Brightness | Threshold | PIR Count | Radar Count | No. of Pixel Clusters | Largest Cluster Size |
|-----------------|------------|-----------|-----------|-------------|-----------------------|----------------------|
| 20140124-114409 | 27         | 50        | 1         | 0           | 210                   | 75                   |
| 20140124-114416 | 27         | 48        | 2         | 5           | 234                   | 20526                |
