# Supplementary material for: WiseEye: Next Generation Expandable and Programmable Camera Trap Platform for Wildlife Research
Source: PubMed Central journal article supplement (PMC5226779; doi:10.1371/journal.pone.0169758), 2017-01-11
Supplement: pone.0169758.s005.pdf [file pone.0169758.s005.pdf]

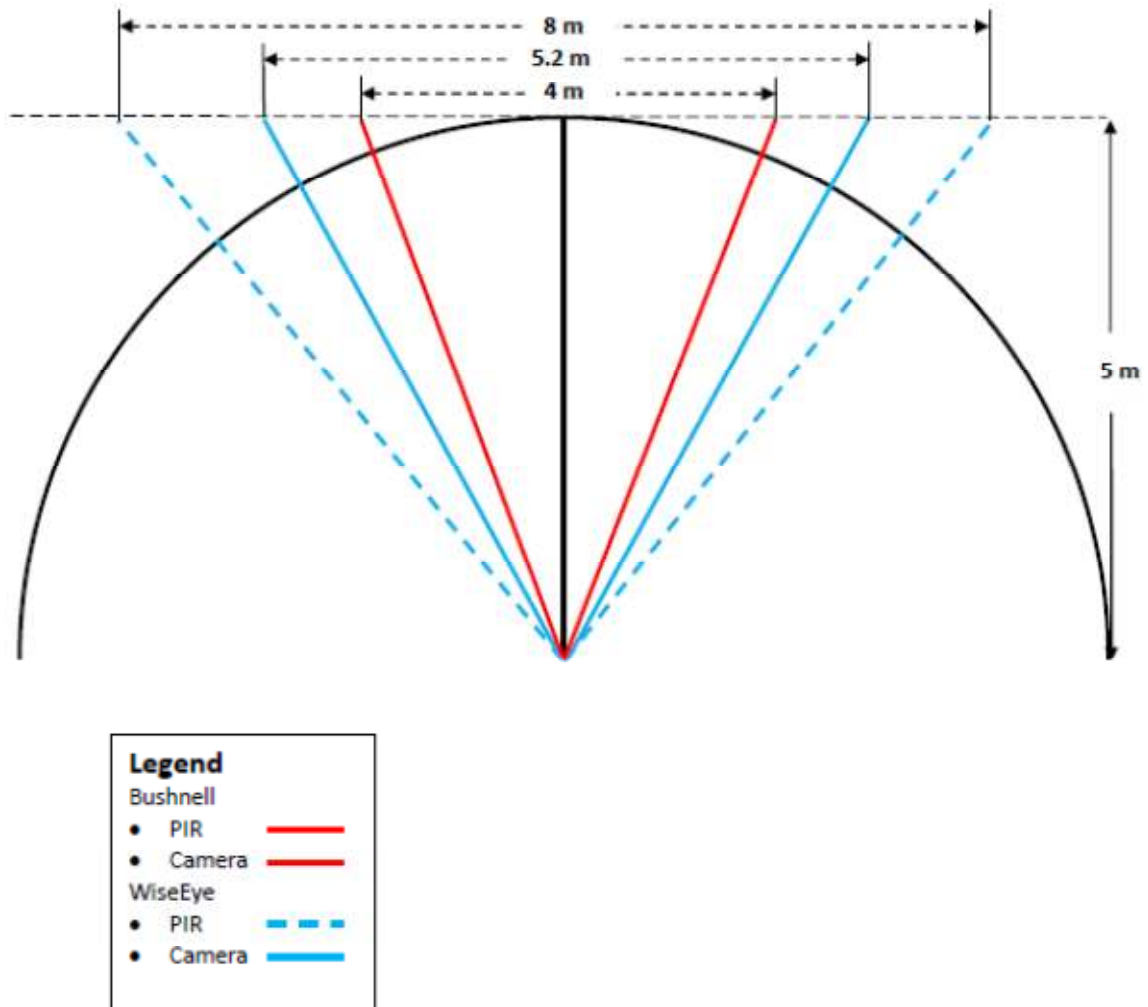

**S1 Fig. Comparison of field of view of the PIR sensor and camera for the WiseEye and Bushnell camera traps.** The detection zone and camera field of view of the Bushnell are the same. For reference the thick black line shows the 5 m radius.
